# Supplementary material for: Synthesis and Characterization of Thiolated Gum Ghatti as a Novel Excipient: Development of Compression-Coated Mucoadhesive Tablets of Domperidone
Source: PubMed Central journal article supplement — ACS Omega. 2021 Jun 10;6(24):15844–54. doi: 10.1021/acsomega.1c01328 (PMC8223422; doi:10.1021/acsomega.1c01328), 2021-06-10
Supplement: ao1c01328_si_001.pdf [file ao1c01328_si_001.pdf]

**Synthesis and characterization of thiolated gum ghatti as a novel excipient:  
Development of compression coated mucoadhesive tablets of domperidone**

**Vivek Puri<sup>1,2</sup>, Ameya Sharma<sup>1,2</sup>, Pradeep Kumar<sup>3</sup>, Inderbir Singh<sup>2\*</sup>, Kampanart  
Huanbutta<sup>4\*</sup>**

*<sup>1</sup>Chitkara College of Pharmacy, Chitkara University, Punjab 140401, India*

*<sup>2</sup>Chitkara University School of Pharmacy, Chitkara University, Himachal Pradesh 174103,  
India*

*<sup>3</sup>Wits Advanced Drug Delivery Platform Research Unit, Department of Pharmacy and  
Pharmacology, School of Therapeutic Sciences, Faculty of Health Sciences, University of the  
Witwatersrand, Johannesburg 2193, South Africa*

*<sup>4</sup>Faculty of Pharmaceutical Sciences, Burapha University, 169, Saensook, Muang, Chonburi,  
20131, Thailand*

\*Corresponding Author: Email: [inderbir.singh@chitkara.edu.in](mailto:inderbir.singh@chitkara.edu.in); Email:  
[kampanart@go.buu.ac.th](mailto:kampanart@go.buu.ac.th)

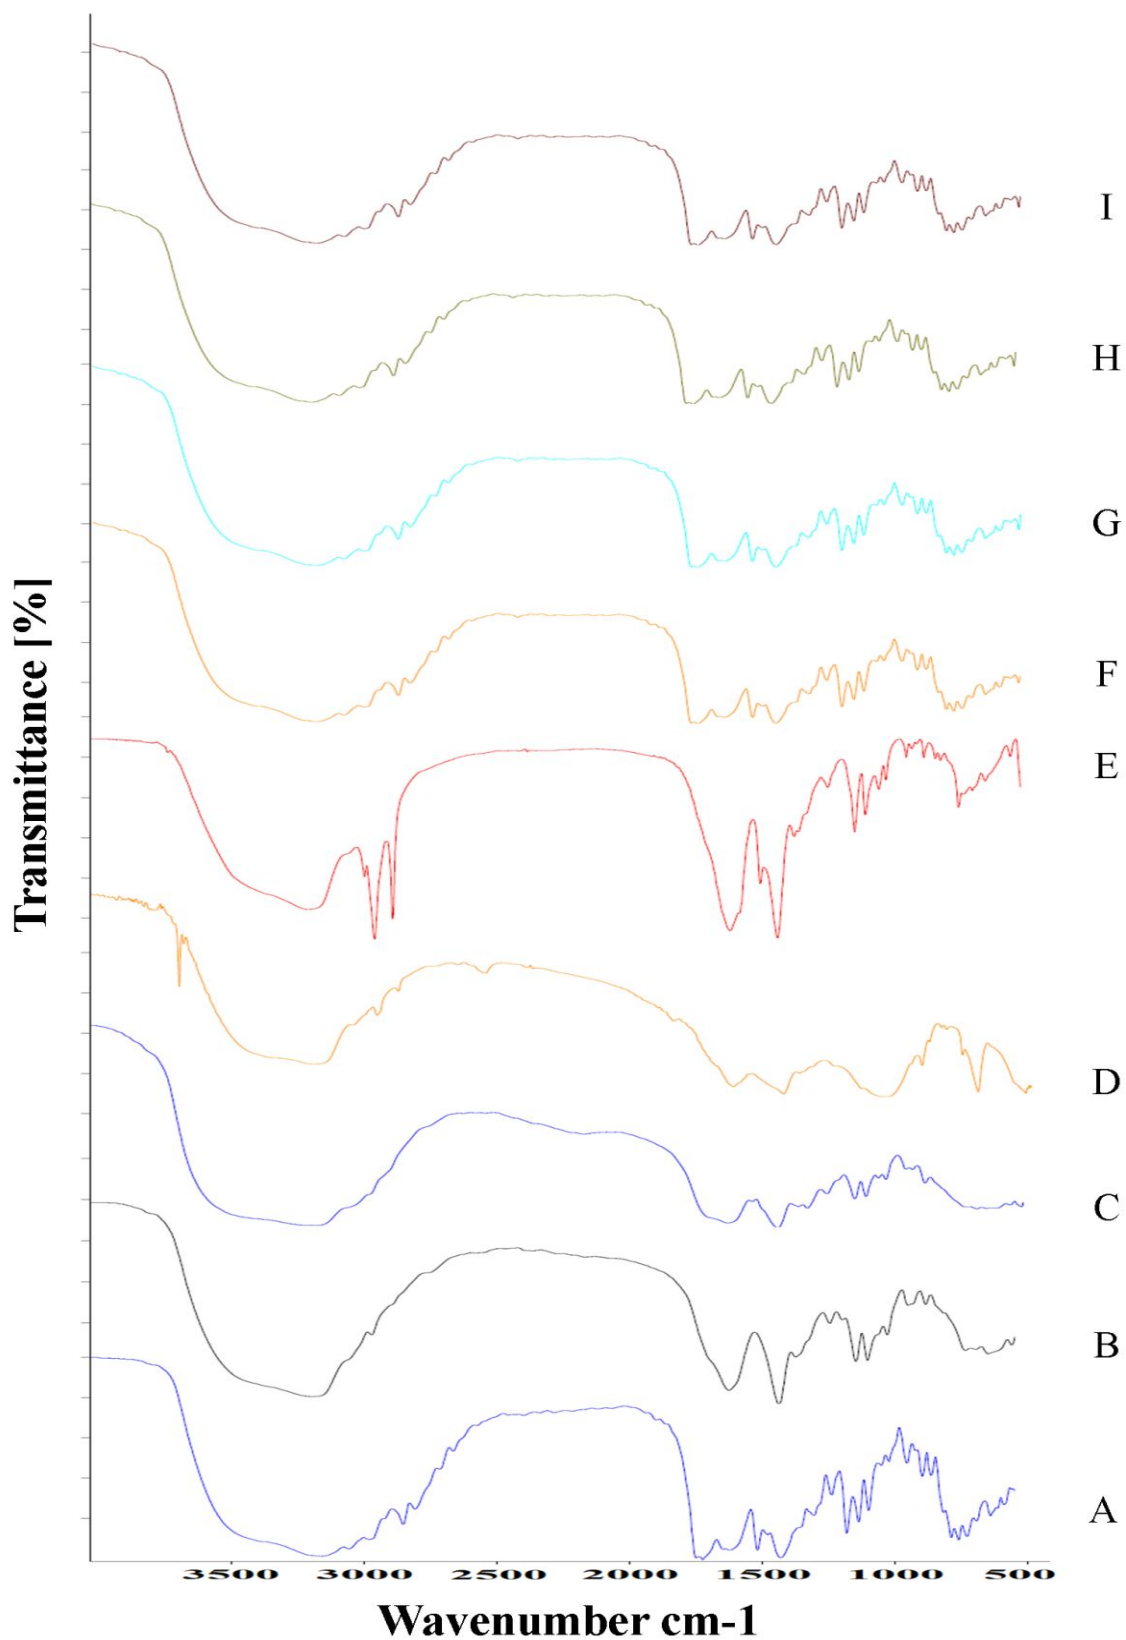

**Figure S1.** FTIR spectra of pure drug and tablet components. (A) Drug (Domperidone); (B) Avicel-112; (C) PVP K30; (D) Talc; (E) Magnesium stearate; (F) Drug with avicel-112; (G) Drug with PVP K30; (H) Drug with talc; (I) Drug with magnesium stearate

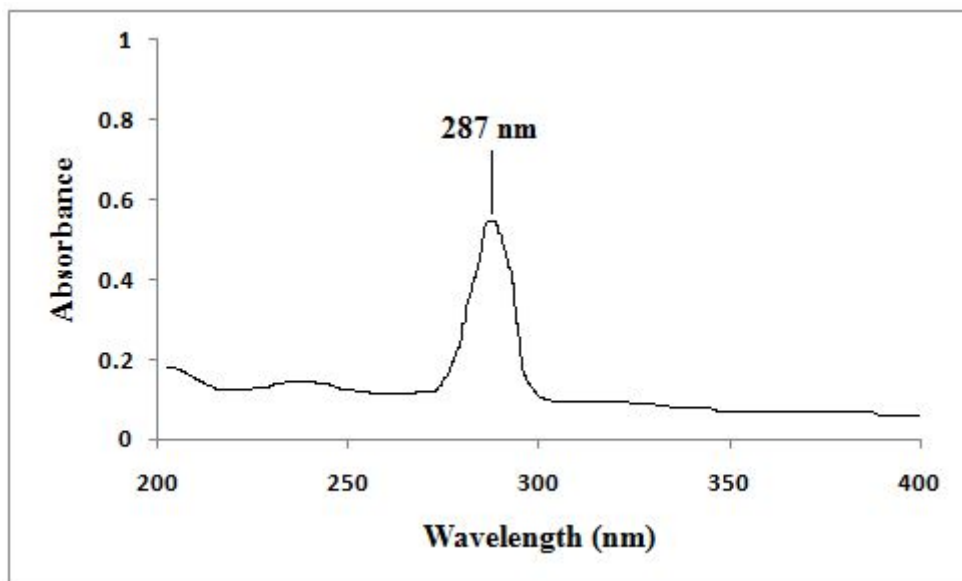

Figure S2. UV absorption maxima of domperidone

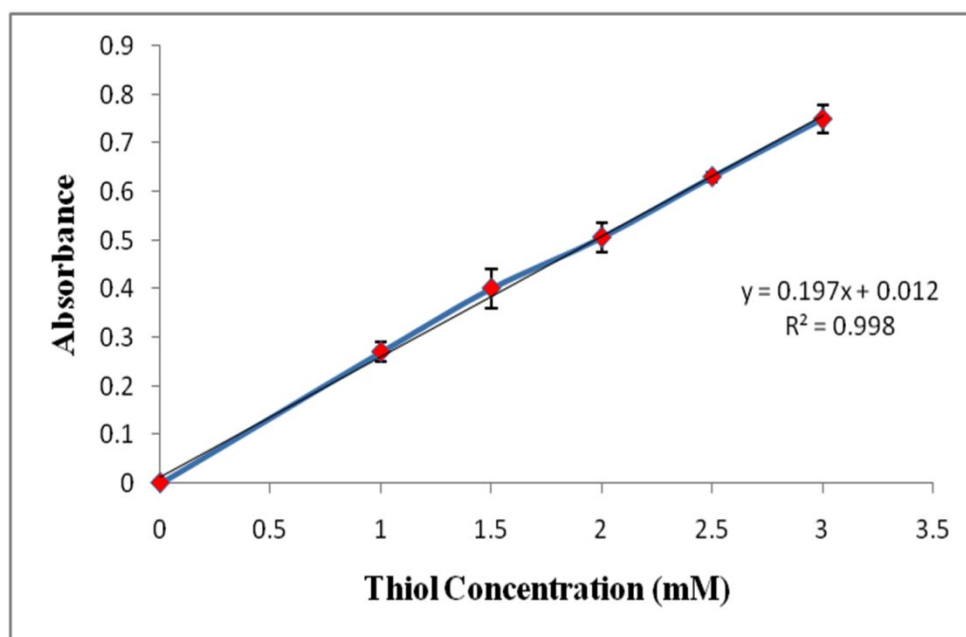

Figure S3. Standard plot of thioglycolic acid
